# Supplementary material for: Convergent Adaptation in the Dominant Global Hospital Clone ST239 of Methicillin-Resistant Staphylococcus aureus
Source: PubMed Central journal article supplement — mBio. 2015 Mar 3;6(2):e00080-15. doi: 10.1128/mBio.00080-15 (PMC4358018; doi:10.1128/mbio.00080-15), 2015-03-03
Supplement: mbo004142208sd1.pdf [file mbo004142208sd1.pdf]

**Dataset S1 - Summary of study isolates and genome sequencing**

| Study ID | Year | Country   | Institution, State   | Site          | Comments      | Reference         | ST,Method    | WGS Platform | Fold Coverage <sup>A</sup> |
|----------|------|-----------|----------------------|---------------|---------------|-------------------|--------------|--------------|----------------------------|
| BPH0468  | 2005 | Australia | QHP, Queensland      | Tissue        | Daptomycin NS | Kelley, JAC, 2011 | ST239 - MLST | MiSeq        | 48.60                      |
| BPH0475  | 2003 | Australia | RMH, Victoria        | Blood Culture | hVISA         | Kelley, JAC, 2011 | ST239 - MLST | MiSeq        | 77.27                      |
| BPH0488  | 2003 | Australia | RMH, Victoria        | Blood Culture | hVISA         | Kelley, JAC, 2011 | ST239 - MLST | MiSeq        | 62.35                      |
| BPH0491  | 2005 | Australia | STV, Victoria        | Blood Culture | hVISA         | Kelley, JAC, 2011 | ST239 - MLST | MiSeq        | 52.35                      |
| BPH0494  | 2005 | Australia | QHP, Queensland      | Blood Culture | hVISA         | Kelley, JAC, 2011 | ST239 - MLST | MiSeq        | 43.98                      |
| BPH0496  | 2004 | Australia | QHP, Queensland      | Tissue        | hVISA         | Kelley, JAC, 2011 | ST239 - MLST | MiSeq        | 42.07                      |
| BPH0499  | 2005 | Australia | MEP, Victoria        | Blood Culture | VISA          | Kelley, JAC, 2011 | ST239 - MLST | MiSeq        | 46.50                      |
| BPH0502  | 2003 | Australia | New South Wales      | Tissue        | VISA          | Kelley, JAC, 2011 | ST239 - MLST | MiSeq        | 54.56                      |
| BPH0503  | 2003 | Australia | Victoria             | Blood Culture | VISA          | Kelley, JAC, 2011 | ST239 - MLST | MiSeq        | 52.96                      |
| BPH0508  | 2006 | Australia | QHP, Queensland      | Blood Culture | VISA          | Kelley, JAC, 2011 | ST239 - MLST | MiSeq        | 53.75                      |
| BPH0509  | 2005 | Australia | QHP, Queensland      | Sputum        | VISA          | Kelley, JAC, 2011 | ST239 - MLST | MiSeq        | 37.73                      |
| BPH0510  | 2005 | Australia | MAH, New South Wales | Blood Culture | VISA          | Kelley, JAC, 2011 | ST239 - MLST | MiSeq        | 70.71                      |
| BPH2002  | 2002 | Australia | AUH, Victoria        | Blood Culture |               | This Study        | ST239 - MLST | MiSeq        | 42.26                      |
| BPH2003  | 2001 | Australia | AUH, Victoria        | Blood Culture |               | This Study        | ST239 - MLST | MiSeq        | 55.33                      |
| BPH2004  | 2001 | Australia | AUH, Victoria        | Blood Culture |               | This Study        | ST239 - MLST | MiSeq        | 47.48                      |
| BPH2005  | 1999 | Australia | AUH, Victoria        | Blood Culture |               | This Study        | ST239 - PCR  | MiSeq        | 63.90                      |
| BPH2006  | 2001 | Australia | AUH, Victoria        | Blood Culture |               | This Study        | ST239 - MLST | MiSeq        | 47.61                      |
| BPH2007  | 2001 | Australia | AUH, Victoria        | Blood Culture |               | This Study        | ST239 - MLST | MiSeq        | 57.89                      |
| BPH2008  | 2000 | Australia | AUH, Victoria        | Blood Culture |               | This Study        | ST239 - MLST | MiSeq        | 75.26                      |
| BPH2009  | 2000 | Australia | AUH, Victoria        | Blood Culture |               | This Study        | ST239 - MLST | MiSeq        | 62.32                      |
| BPH2010  | 2001 | Australia | AUH, Victoria        | Blood Culture |               | This Study        | ST239 - MLST | MiSeq        | 41.55                      |
| BPH2011  | 2001 | Australia | AUH, Victoria        | Blood Culture |               | This Study        | ST239 - MLST | MiSeq        | 36.01                      |
| BPH2012  | 1999 | Australia | AUH, Victoria        | Blood Culture |               | This Study        | ST239 - PCR  | MiSeq        | 61.00                      |
| BPH2013  | 2004 | Australia | AUH, Victoria        | Blood Culture |               | This Study        | ST239 - MLST | MiSeq        | 40.22                      |
| BPH2014  | 1999 | Australia | AUH, Victoria        | Blood Culture |               | This Study        | ST239 - PCR  | MiSeq        | 49.19                      |
| BPH2015  | 2004 | Australia | AUH, Victoria        | Blood Culture |               | This Study        | ST239 - MLST | MiSeq        | 45.21                      |
| BPH2016  | 2005 | Australia | AUH, Victoria        | Blood Culture |               | This Study        | ST239 - MLST | MiSeq        | 66.54                      |
| BPH2017  | 2005 | Australia | AUH, Victoria        | Blood Culture |               | This Study        | ST239 - MLST | MiSeq        | 40.46                      |
| BPH2018  | 2004 | Australia | AUH, Victoria        | Blood Culture |               | This Study        | ST239 - MLST | MiSeq        | 69.07                      |
| BPH2019  | 2005 | Australia | MEH, Victoria        | Blood Culture |               | This Study        | ST239 - MLST | MiSeq        | 68.19                      |
| BPH2021  | 2004 | Australia | AUH, Victoria        | Blood Culture |               | This Study        | ST239 - MLST | MiSeq        | 51.29                      |
| BPH2022  | 2005 | Australia | AUH, Victoria        | Blood Culture |               | This Study        | ST239 - MLST | MiSeq        | 47.83                      |
| BPH2023  | 2006 | Australia | AUH, Victoria        | Blood Culture |               | This Study        | ST239 - MLST | MiSeq        | 38.39                      |
| BPH2024  | 2007 | Australia | AUH, Victoria        | Blood Culture |               | This Study        | ST239 - MLST | MiSeq        | 50.02                      |
| BPH2025  | 2008 | Australia | AUH, Victoria        | Blood Culture |               | Holmes, JID, 2011 | ST239 - PCR  | MiSeq        | 47.44                      |
| BPH2026  | 2007 | Australia | MMC, Victoria        | Blood Culture |               | Holmes, JID, 2011 | ST239 - PCR  | MiSeq        | 40.85                      |
| BPH2028  | 2007 | Australia | MMC, Victoria        | Blood Culture |               | Holmes, JID, 2011 | ST239 - PCR  | MiSeq        | 57.35                      |
| BPH2029  | 2009 | Australia | AUH, Victoria        | Blood Culture |               | This Study        | ST239 - MLST | MiSeq        | 59.73                      |
| BPH2031  | 2008 | Australia | AUH, Victoria        | Blood Culture |               | This Study        | ST239 - MLST | MiSeq        | 47.72                      |
| BPH2032  | 1998 | Australia | AUH, Victoria        | Blood Culture |               | This Study        | ST239 - PCR  | MiSeq        | 51.32                      |
| BPH2033  | 2008 | Australia | AUH, Victoria        | Blood Culture |               | Holmes, JID, 2011 | ST239 - PCR  | MiSeq        | 72.27                      |

|                |      |             |                      |               |                                  |                           |              |                    |        |
|----------------|------|-------------|----------------------|---------------|----------------------------------|---------------------------|--------------|--------------------|--------|
| <b>BPH2034</b> | 2008 | Australia   | AUH, Victoria        | Blood Culture |                                  | This Study                | ST239 - MLST | MiSeq              | 68.16  |
| <b>BPH2035</b> | 2008 | Australia   | AUH, Victoria        | Blood Culture |                                  | Holmes, JID, 2011         | ST239 - PCR  | MiSeq              | 77.30  |
| <b>BPH2037</b> | 2008 | Australia   | AUH, Victoria        | Blood Culture |                                  | MSSA<br>Holmes, JID, 2011 | ST239 - PCR  | MiSeq              | 45.56  |
| <b>BPH2045</b> | 2007 | Australia   | WEH, New South Wales | Blood Culture |                                  | MSSA<br>Holmes, JID, 2011 | ST239 - PCR  | MiSeq              | 40.45  |
| <b>BPH2054</b> | 1980 | Australia   | ALH, Victoria        |               |                                  | This Study                | ST239 - PCR  | MiSeq              | 58.51  |
| <b>BPH2055</b> | 1980 | Australia   | ALH, Victoria        |               |                                  | This Study                | ST239 - PCR  | MiSeq              | 48.64  |
| <b>BPH2056</b> | 1981 | Australia   | ALH, Victoria        |               |                                  | This Study                | ST239 - PCR  | MiSeq              | 71.83  |
| <b>BPH2057</b> | 1981 | Australia   | ALH, Victoria        |               |                                  | This Study                | ST239 - PCR  | MiSeq              | 43.96  |
| <b>BPH2059</b> | 1981 | Australia   | ALH, Victoria        |               | Freeze dried in 1981             | This Study                | ST239 - PCR  | MiSeq              | 50.86  |
| <b>BPH2068</b> | 2009 | Australia   | AUH, Victoria        |               |                                  | This Study                | ST239 - MLST | MiSeq              | 49.90  |
| <b>BPH2070</b> | 1998 | Australia   | AUH, Victoria        | Blood Culture |                                  | This Study                | ST239 - PCR  | MiSeq              | 46.49  |
| <b>BPH2071</b> | 1998 | Australia   | AUH, Victoria        | Blood Culture |                                  | This Study                | ST239 - PCR  | MiSeq              | 53.01  |
| <b>BPH2072</b> | 1982 | Australia   | RNS, New South Wales | Tissue        |                                  | This Study *              | ST239 - PCR  | MiSeq              | 44.29  |
| <b>BPH2073</b> | 1982 | Australia   | RNS, New South Wales | Tissue        |                                  | This Study *              | ST239 - PCR  | MiSeq              | 52.52  |
| <b>BPH2075</b> | 1982 | Australia   | RNS, New South Wales | Tissue        |                                  | This Study *              | ST239 - PCR  | MiSeq              | 48.92  |
| <b>BPH2077</b> | 1982 | Australia   | RNS, New South Wales | Tissue        |                                  | This Study *              | ST239 - PCR  | MiSeq              | 52.00  |
| <b>BPH2078</b> | 1982 | Australia   | RPA, New South Wales |               |                                  | This Study *              | ST239 - PCR  | MiSeq              | 51.97  |
| <b>BPH2079</b> | 1982 | Australia   | RPA, New South Wales |               |                                  | This Study *              | ST239 - PCR  | MiSeq              | 47.73  |
| <b>BPH2080</b> | 1982 | Australia   | RPA, New South Wales |               |                                  | This Study *              | ST239 - PCR  | MiSeq              | 58.06  |
| <b>BPH2081</b> | 1982 | Australia   | RPA, New South Wales |               |                                  | This Study *              | ST239 - PCR  | MiSeq              | 73.30  |
| <b>BPH2082</b> | 1982 | Australia   | RPA, New South Wales |               |                                  | This Study *              | ST239 - PCR  | MiSeq              | 47.14  |
| <b>BPH2083</b> | 1982 | Australia   | RPA, New South Wales |               |                                  | This Study *              | ST239 - PCR  | MiSeq              | 43.36  |
| <b>BPH2084</b> | 1982 | Australia   | RPA, New South Wales |               |                                  | This Study *              | ST239 - PCR  | MiSeq              | 68.88  |
| <b>BPH2085</b> | 1982 | Australia   | RPA, New South Wales |               |                                  | This Study *              | ST239 - PCR  | MiSeq              | 37.01  |
| <b>BPH2086</b> | 1982 | Australia   | RPA, New South Wales |               |                                  | This Study *              | ST239 - PCR  | MiSeq              | 50.32  |
| <b>BPH2088</b> | 1982 | Australia   | RPA, New South Wales |               |                                  | This Study *              | ST239 - PCR  | MiSeq              | 57.01  |
| <b>BPH2090</b> | 2012 | Australia   | AUH, Victoria        |               |                                  | MSSA<br>This Study        | ST239 - PCR  | MiSeq              | 62.75  |
| <b>BPH2094</b> | 1998 | Australia   | LPH, New South Wales | Blood Culture |                                  | This Study **             | ST239 - WGS  | Ion Torrent PGM    | 169.55 |
| <b>BPH2095</b> | 2003 | Australia   | LPH, New South Wales | Blood Culture |                                  | This Study **             | ST239 - WGS  | Ion Torrent PGM    | 84.28  |
| <b>BPH2096</b> | 2005 | Australia   | LPH, New South Wales | Blood Culture |                                  | This Study **             | ST239 - WGS  | Ion Torrent PGM    | 86.54  |
| <b>BPH2097</b> | 2007 | Australia   | LPH, New South Wales | Blood Culture |                                  | This Study **             | ST239 - WGS  | Ion Torrent PGM    | 76.54  |
| <b>BPH2098</b> | 2007 | Australia   | LPH, New South Wales | Blood Culture |                                  | This Study **             | ST239 - WGS  | Ion Torrent PGM    | 96.24  |
| <b>BPH2099</b> | 2007 | Australia   | LPH, New South Wales | Blood Culture |                                  | This Study **             | ST239 - WGS  | Ion Torrent PGM    | 206.32 |
| <b>JKD6000</b> | 2002 | Australia   | MMC, Victoria        | Blood Culture | VSSA variant of JKD6001          | Howden, AAC, 2006         | ST239 - WGS  | Genome Analyser Ix | 129.45 |
| <b>JKD6001</b> | 2003 | Australia   | MMC, Victoria        | Blood Culture | VISA variant of JKD6000          | Howden, AAC, 2006         | ST239 - WGS  | Genome Analyser Ix | 186.63 |
| <b>JKD6004</b> | 2002 | Australia   | RBH, Queensland      | Blood Culture | hVISA variant of JKD6005         | Howden, AAC, 2006         | ST239 - WGS  | Genome Analyser Ix | 177.92 |
| <b>JKD6005</b> | 2002 | Australia   | RBH, Queensland      | Blood Culture | VISA variant of JKD6004          | Howden, AAC, 2006         | ST239 - WGS  | Genome Analyser Ix | 200.37 |
| <b>JKD6007</b> | 2002 | Australia   | RBH, Queensland      | Blood Culture | Morphological variant of JKD6004 | This Study                | ST239 - PCR  | MiSeq              | 44.63  |
| <b>JKD6008</b> | 2003 | New Zealand |                      | Blood Culture | VSSA variant of JKD6009          | Howden, AAC, 2006         | ST239 - WGS  | Genome Analyser Ix | 51.08  |
| <b>JKD6009</b> | 2003 | New Zealand |                      | Tissue        | VISA variant of JKD6008          | Howden, AAC, 2006         | ST239 - WGS  | Genome Analyser Ix | 236.32 |
| <b>JKD6021</b> | 2001 | Australia   | AUH, Victoria        | Blood Culture | VSSA variant of JKD6023          | Howden, AAC, 2006         | ST239 - WGS  | Genome Analyser Ix | 95.70  |
| <b>JKD6022</b> | 2001 | Australia   | AUH, Victoria        | Blood Culture | Morphological variant of JKD6023 | This Study                | ST239 - PCR  | MiSeq              | 37.57  |
| <b>JKD6023</b> | 2001 | Australia   | AUH, Victoria        | Blood Culture | VISA variant of JKD6021          | Howden, AAC, 2006         | ST239 - WGS  | Genome Analyser Ix | 144.36 |
| <b>JKD6051</b> | 2003 | Australia   | RBH, Queensland      | Blood Culture | VSSA variant of JKD6052          | Howden, AAC, 2006         | ST239 - WGS  | Genome Analyser Ix | 134.08 |

|                |      |                |                 |               |                          |                       |             |                     |        |
|----------------|------|----------------|-----------------|---------------|--------------------------|-----------------------|-------------|---------------------|--------|
| <b>JKD6052</b> | 2004 | Australia      | RBH, Queensland | Blood Culture | hVISA variant of JKD6051 | Howden, AAC, 2006     | ST239 - WGS | Genome Analyser IIx | 146.30 |
| <b>JKD6121</b> | 2005 | Australia      | AUH, Victoria   | Blood Culture | SCV                      | This Study            | ST239 - WGS | Genome Analyser IIx | 181.09 |
| <b>BPH0365</b> | 1996 | Turkey         |                 |               |                          | Harris, Science, 2010 | ST239 - PCR | MiSeq               | 56.49  |
| <b>BPH0366</b> | 1996 | Hungary        |                 |               |                          | Harris, Science, 2010 | ST239 - PCR | MiSeq               | 65.53  |
| <b>2A8</b>     | 2001 | Czech Republic |                 |               | WGS Reads Only           | Harris, Science, 2010 | ST239 - WGS | Genome Analyser IIx | 34.58  |
| <b>AGT1</b>    | 1997 | Argentina      |                 |               | WGS Reads Only           | Harris, Science, 2010 | ST239 - WGS | Genome Analyser IIx | 30.10  |
| <b>AGT9</b>    | 1997 | Argentina      |                 |               | WGS Reads Only           | Harris, Science, 2010 | ST239 - WGS | Genome Analyser IIx | 29.79  |
| <b>AGT67</b>   | 1997 | Argentina      |                 |               | WGS Reads Only           | Harris, Science, 2010 | ST239 - WGS | Genome Analyser IIx | 34.03  |
| <b>AGT120</b>  | 1998 | Argentina      |                 |               | WGS Reads Only           | Harris, Science, 2010 | ST239 - WGS | Genome Analyser IIx | 29.20  |
| <b>BRA2</b>    | 1997 | Brazil         |                 |               | WGS Reads Only           | Harris, Science, 2010 | ST239 - WGS | Genome Analyser IIx | 31.51  |
| <b>BZ48</b>    | 1997 | Brazil         |                 |               | WGS Reads Only           | Harris, Science, 2010 | ST239 - WGS | Genome Analyser IIx | 28.05  |
| <b>CHI59</b>   | 1998 | China          |                 |               | WGS Reads Only           | Harris, Science, 2010 | ST239 - WGS | Genome Analyser IIx | 27.00  |
| <b>CHI61</b>   | 1998 | China          |                 |               | WGS Reads Only           | Harris, Science, 2010 | ST239 - WGS | Genome Analyser IIx | 26.54  |
| <b>CHL151</b>  | 1998 | Chile          |                 |               | WGS Reads Only           | Harris, Science, 2010 | ST239 - WGS | Genome Analyser IIx | 28.38  |
| <b>DEN907</b>  | 2001 | Denmark        |                 |               | WGS Reads Only           | Harris, Science, 2010 | ST239 - WGS | Genome Analyser IIx | 31.86  |
| <b>HGSA142</b> | 2003 | Portugal       |                 |               | WGS Reads Only           | Harris, Science, 2010 | ST239 - WGS | Genome Analyser IIx | 32.52  |
| <b>HSJ216</b>  | 1997 | Portugal       |                 |               | WGS Reads Only           | Harris, Science, 2010 | ST239 - WGS | Genome Analyser IIx | 25.32  |
| <b>ICP5011</b> | 1993 | Portugal       |                 |               | WGS Reads Only           | Harris, Science, 2010 | ST239 - WGS | Genome Analyser IIx | 38.78  |
| <b>ICP5014</b> | 1993 | Portugal       |                 |               | WGS Reads Only           | Harris, Science, 2010 | ST239 - WGS | Genome Analyser IIx | 41.82  |
| <b>LHH1</b>    | 1994 | United States  |                 |               | WGS Reads Only           | Harris, Science, 2010 | ST239 - WGS | Genome Analyser IIx | 35.78  |
| <b>S2</b>      | 2006 | Thailand       |                 |               | WGS Reads Only           | Harris, Science, 2010 | ST239 - WGS | Genome Analyser IIx | 29.05  |
| <b>S7</b>      | 2006 | Thailand       |                 |               | WGS Reads Only           | Harris, Science, 2010 | ST239 - WGS | Genome Analyser IIx | 54.89  |
| <b>S25</b>     | 2006 | Thailand       |                 |               | WGS Reads Only           | Harris, Science, 2010 | ST239 - WGS | Genome Analyser IIx | 38.74  |
| <b>S26</b>     | 2006 | Thailand       |                 |               | WGS Reads Only           | Harris, Science, 2010 | ST239 - WGS | Genome Analyser IIx | 46.72  |
| <b>S38</b>     | 2006 | Thailand       |                 |               | WGS Reads Only           | Harris, Science, 2010 | ST239 - WGS | Genome Analyser IIx | 29.05  |
| <b>S39</b>     | 2006 | Thailand       |                 |               | WGS Reads Only           | Harris, Science, 2010 | ST239 - WGS | Genome Analyser IIx | 31.59  |
| <b>S40</b>     | 2006 | Thailand       |                 |               | WGS Reads Only           | Harris, Science, 2010 | ST239 - WGS | Genome Analyser IIx | 31.59  |
| <b>S71</b>     | 2007 | Thailand       |                 |               | WGS Reads Only           | Harris, Science, 2010 | ST239 - WGS | Genome Analyser IIx | 37.01  |
| <b>S78</b>     | 2007 | Thailand       |                 |               | WGS Reads Only           | Harris, Science, 2010 | ST239 - WGS | Genome Analyser IIx | 31.34  |
| <b>S81</b>     | 2007 | Thailand       |                 |               | WGS Reads Only           | Harris, Science, 2010 | ST239 - WGS | Genome Analyser IIx | 30.54  |
| <b>S87</b>     | 2007 | Thailand       |                 |               | WGS Reads Only           | Harris, Science, 2010 | ST239 - WGS | Genome Analyser IIx | 27.25  |
| <b>S93</b>     | 2007 | Thailand       |                 |               | WGS Reads Only           | Harris, Science, 2010 | ST239 - WGS | Genome Analyser IIx | 26.57  |
| <b>S102</b>    | 2007 | Thailand       |                 |               | WGS Reads Only           | Harris, Science, 2010 | ST239 - WGS | Genome Analyser IIx | 26.24  |
| <b>S106</b>    | 2007 | Thailand       |                 |               | WGS Reads Only           | Harris, Science, 2010 | ST239 - WGS | Genome Analyser IIx | 34.13  |
| <b>TUR1</b>    | 1996 | Turkey         |                 |               | WGS Reads Only           | Harris, Science, 2010 | ST239 - WGS | Genome Analyser IIx | 25.57  |
| <b>TW20</b>    | 2003 | United Kingdom |                 |               | WGS Reads Only           | Harris, Science, 2010 | ST239 - WGS | Genome Analyser IIx | -      |
| <b>URU34</b>   | 1997 | Uruguay        |                 |               | WGS Reads Only           | Harris, Science, 2010 | ST239 - WGS | Genome Analyser IIx | 33.47  |
| <b>URU110</b>  | 1998 | Uruguay        |                 |               | WGS Reads Only           | Harris, Science, 2010 | ST239 - WGS | Genome Analyser IIx | 27.33  |

\* Strains provided courtesy of author NF; \*\*Strains and WGS provided courtesy of authors SOJ and SJH; <sup>A</sup>Mapped to TW20; Manufacturers of sequencing platforms used: MiSeq (Illumina), Ion Torrent PGM (Life Technologies), Genome Analyser IIx (Illumina); Abbreviations: MSSA = methicillin-resistant S. aureus, NS = non susceptible, SCV = small colony variant, VISA = vancomycin-intermediate S.aureus, hVISA = heterogeneous VISA, WGS = Whole Genome Sequencing
