# Supplementary material for: Convergent Adaptation in the Dominant Global Hospital Clone ST239 of Methicillin-Resistant Staphylococcus aureus
Source: PubMed Central journal article supplement — mBio. 2015 Mar 3;6(2):e00080-15. doi: 10.1128/mBio.00080-15 (PMC4358018; doi:10.1128/mbio.00080-15), 2015-03-03
Supplement: mbo004142208sf2.pdf [file mbo004142208sf2.pdf]

A

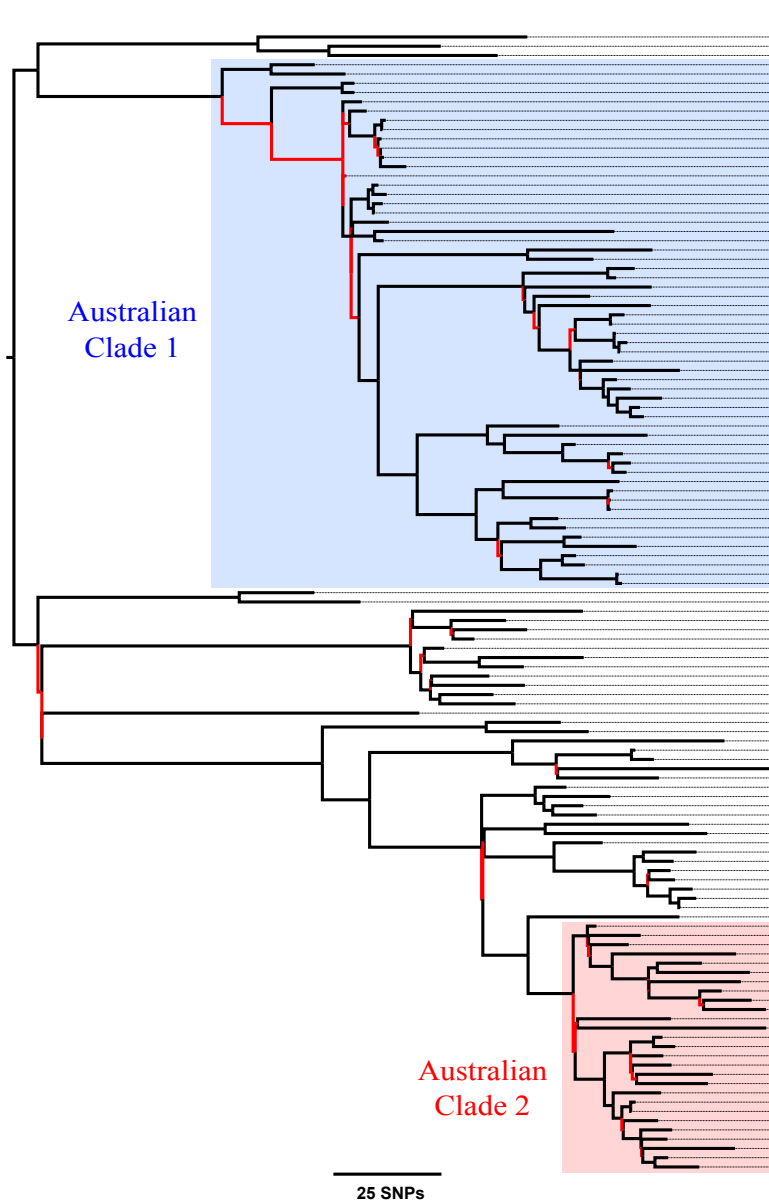

B

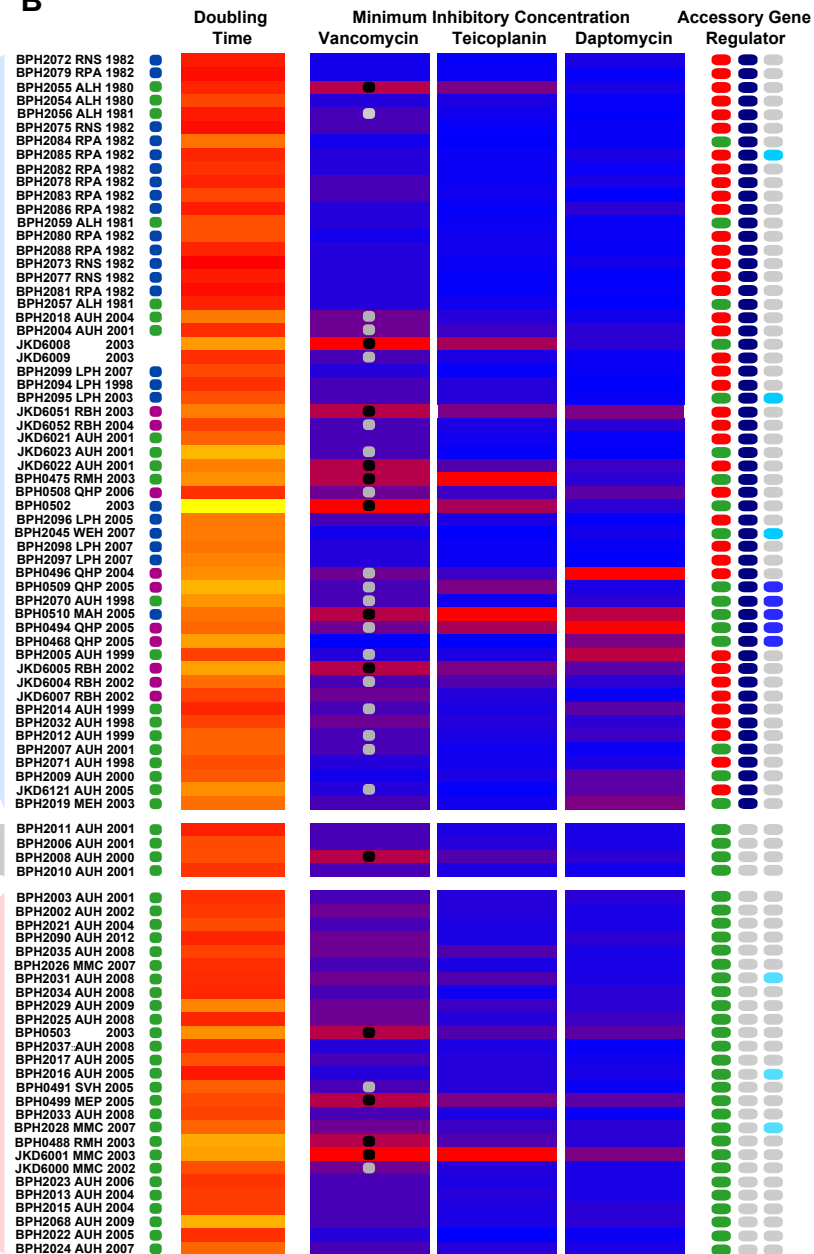

Australian States - ● Victoria, ● New South Wales, ● Queensland; ● hVISA, ● VISA; Delta-Haemolysin ● Positive, ● Negative; Mutations resulting in ● *agrC* R6S, ● *agrC* R393C, ● Other *agr* Mutation
