# Supplementary material for: Convergent Adaptation in the Dominant Global Hospital Clone ST239 of Methicillin-Resistant Staphylococcus aureus
Source: PubMed Central journal article supplement — mBio. 2015 Mar 3;6(2):e00080-15. doi: 10.1128/mBio.00080-15 (PMC4358018; doi:10.1128/mbio.00080-15), 2015-03-03
Supplement: mbo004142208sf3.pdf [file mbo004142208sf3.pdf]

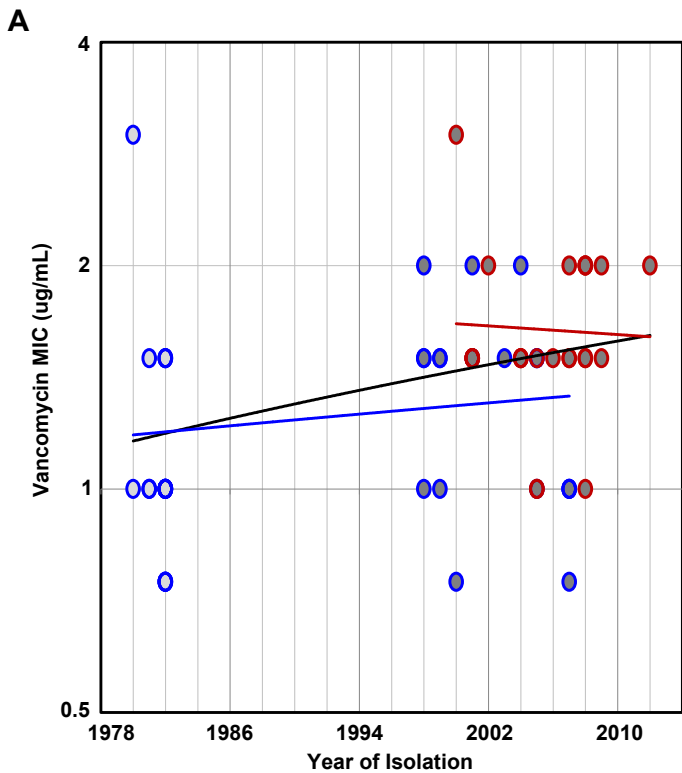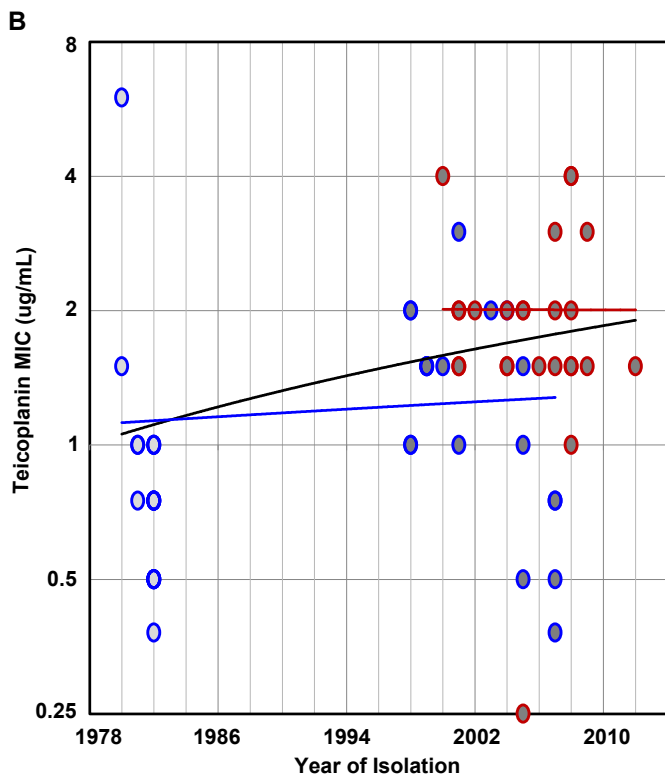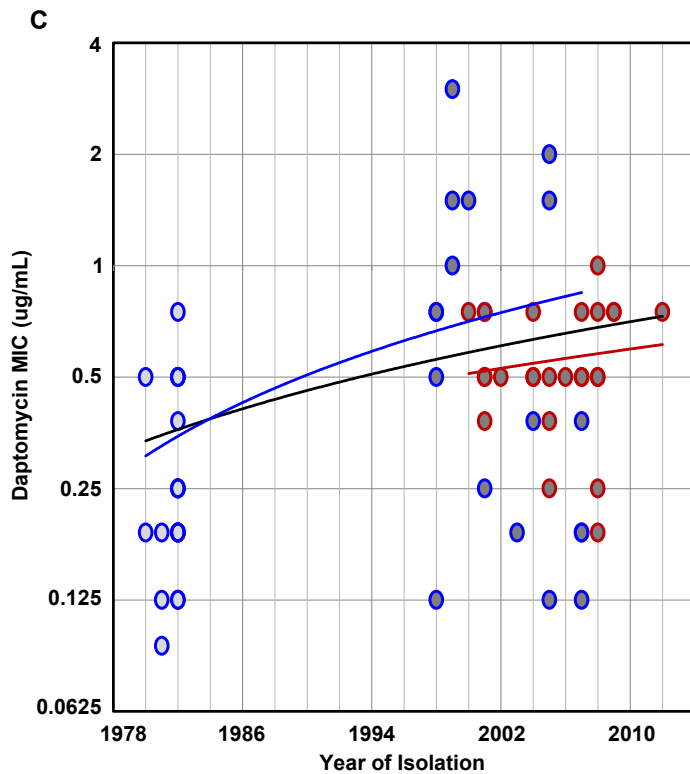

- Recovered during 1980s
- Recovered after 1990
- Phylogenetic Clade 1
- Phylogenetic Clade 2
- Log Trend Line (All Isolates)
- Log Trend Line (Clade 1)
- Log Trend Line (Clade 2)
