# Supplementary material for: Convergent Adaptation in the Dominant Global Hospital Clone ST239 of Methicillin-Resistant Staphylococcus aureus
Source: PubMed Central journal article supplement — mBio. 2015 Mar 3;6(2):e00080-15. doi: 10.1128/mBio.00080-15 (PMC4358018; doi:10.1128/mbio.00080-15), 2015-03-03
Supplement: mbo004142208st1.pdf [file mbo004142208st1.pdf]

**Table S1: WalKR mutations in Australian ST239 MRSA**

| <b>Mutation</b>       | <b>Isolate Region Year</b> | <b>Clade</b> | <b>Vancomycin<br/>MIC (<math>\mu\text{g/mL}</math>)<sup>a</sup></b> | <b>MET<br/>Interpretation</b> |
|-----------------------|----------------------------|--------------|---------------------------------------------------------------------|-------------------------------|
| WalR <sub>A98T</sub>  | JKD6001 VIC 2003           | 2            | 4                                                                   | VISA                          |
| WalR <sub>T103M</sub> | BPH0503 VIC 2003           | 2            | 3                                                                   | VISA                          |
| WalR <sub>K210R</sub> | JKD6005 QLD 2002           | 1            | 3                                                                   | VISA                          |
|                       | JKD6008 NZD 2003           | 1            | 4                                                                   | VISA                          |
| WalK <sub>S9F</sub>   | BPH0488 VIC 2003           | 2            | 3                                                                   | VISA                          |
| WalK <sub>M220I</sub> | BPH2055 VIC 1982           | 1            | 3                                                                   | VISA                          |
| WalK <sub>A243T</sub> | BPH0510 NSW 2005           | 1            | 3                                                                   | VISA                          |
| WalK <sub>V268F</sub> | JKD6023 VIC 2001           | 1            | 1.5                                                                 | hVISA                         |
| WalK <sub>A361V</sub> | BPH2031 VIC 2008           | 2            | 2                                                                   | VSSA                          |
| WalK <sub>M426I</sub> | BPH0494 QLD 2005           | 1            | 2                                                                   | hVISA                         |
| WalK <sub>A502V</sub> | BPH0499 VIC 2005           | 2            | 3                                                                   | VISA                          |

<sup>a</sup> As determined by Etest

MET, macro-Etest; MIC, minimum inhibitory concentration; VISA, vancomycin-intermediate *S. aureus*; hVISA, heterogeneous VISA; VSSA, vancomycin-susceptible *S. aureus*; VIC, Victoria; QLD, Queensland; NSW, New South Wales; NZD, New Zealand
