# Supplementary material for: Convergent Adaptation in the Dominant Global Hospital Clone ST239 of Methicillin-Resistant Staphylococcus aureus
Source: PubMed Central journal article supplement — mBio. 2015 Mar 3;6(2):e00080-15. doi: 10.1128/mBio.00080-15 (PMC4358018; doi:10.1128/mbio.00080-15), 2015-03-03
Supplement: mbo004142208st2.pdf [file mbo004142208st2.pdf]

**Table S2 - Single nucleotide polymorphisms detected within the *agr* locus**

| Mutation (Location) <sup>a</sup>             | Predicted Consequence | Prevalence Amongst Collection    |                                  |       |
|----------------------------------------------|-----------------------|----------------------------------|----------------------------------|-------|
|                                              |                       | <i>agr</i> Positive <sup>b</sup> | <i>agr</i> Negative <sup>b</sup> | Total |
| C-A (2172611)                                | AgrC <sub>R6S</sub>   | 40                               | 16                               | 56    |
| C-T (2173112)                                | AgrC <sub>P24S</sub>  | 0                                | 1                                | 1     |
| T-C (2173535)                                | AgrC <sub>F165L</sub> | 0                                | 1                                | 1     |
| INS-C (2173719)                              | AgrC - Frame shift    | 1                                | 0                                | 1     |
| G-A (2174192)                                | AgrC <sub>E384K</sub> | 0                                | 1                                | 1     |
| C-T (2174219)                                | AgrC <sub>R393C</sub> | 0                                | 5                                | 5     |
| T-C (2174754)                                | AgrA <sub>L134S</sub> | 0                                | 1                                | 1     |
| INS-A (2175059)                              | AgrA - Frame shift    | 0                                | 1                                | 1     |
| No mutation                                  |                       | 0                                | 27                               | 27    |
| No mutation (excluding AgrC <sub>R6S</sub> ) |                       | 39                               | 37                               | 76    |

<sup>a</sup>Base position in TW20

<sup>b</sup>*agr* activity determined by the visual assessment of delta-haemolysis (present, positive; absent, negative)
