# Supplementary figures and images for: Convergent Adaptation in the Dominant Global Hospital Clone ST239 of Methicillin-Resistant Staphylococcus aureus
Source: PubMed Central journal article supplement — mBio. 2015 Mar 3;6(2):e00080-15. doi: 10.1128/mBio.00080-15 (PMC4358018; doi:10.1128/mbio.00080-15), 2015-03-03

A

B

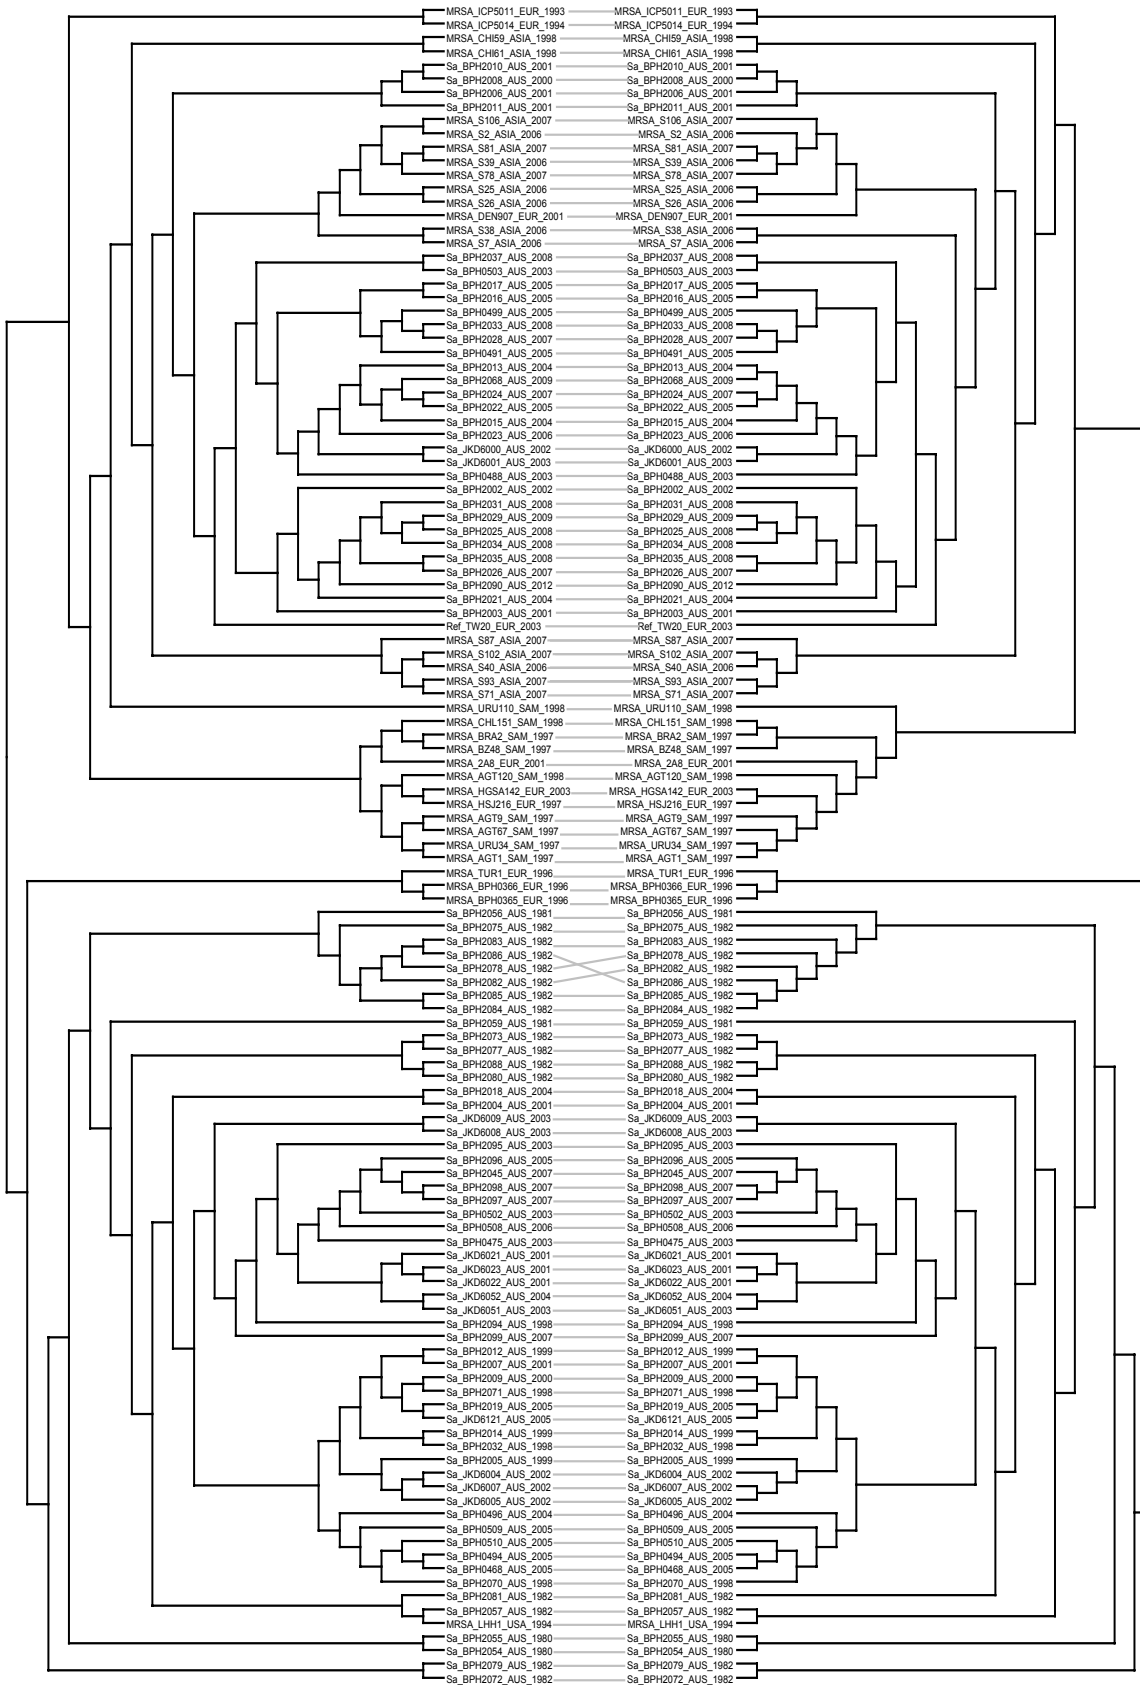

Supplement: mbo004142208sf1.pdf [file mbo004142208sf1.pdf]

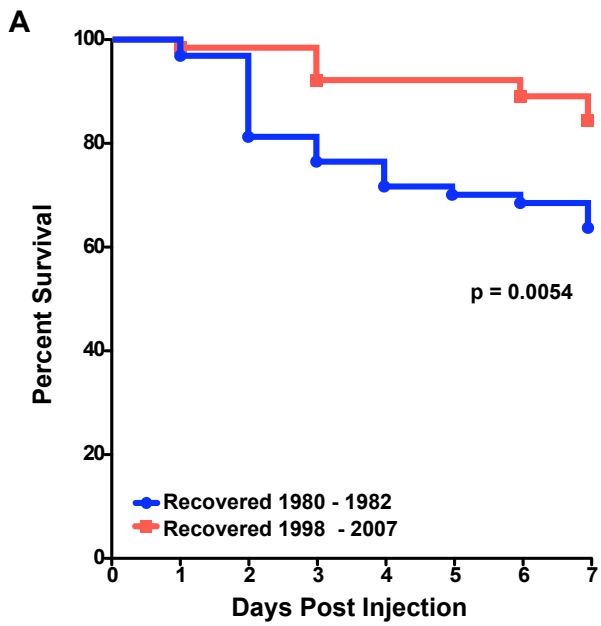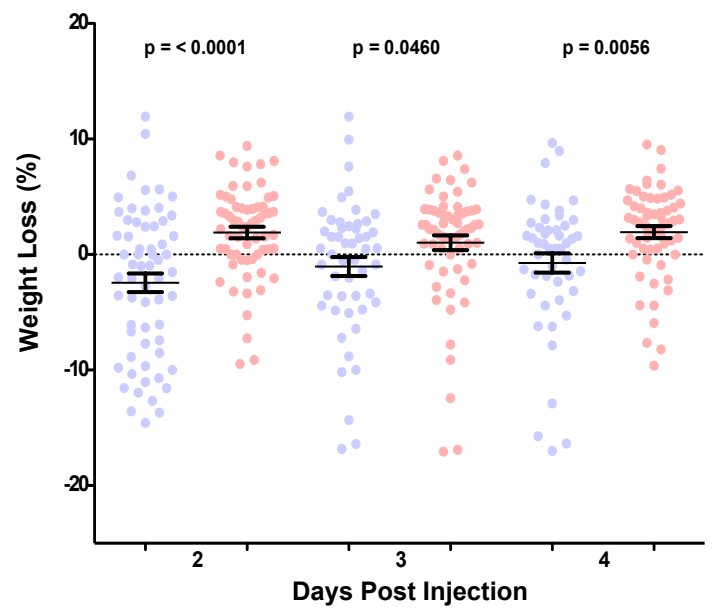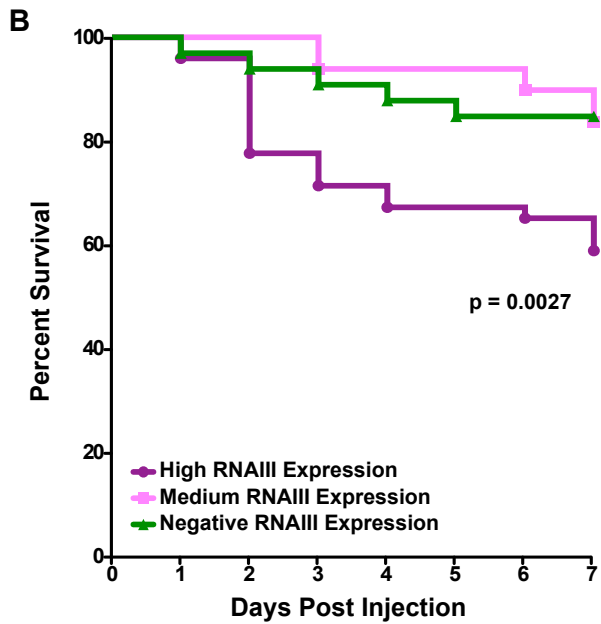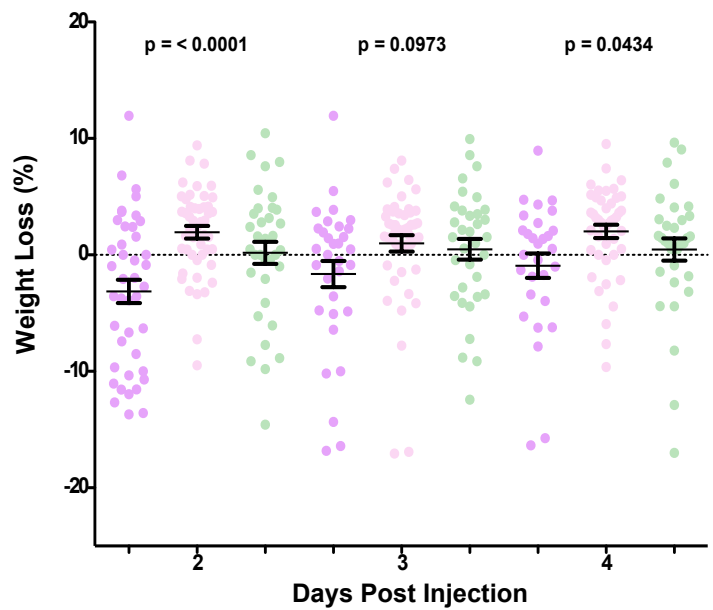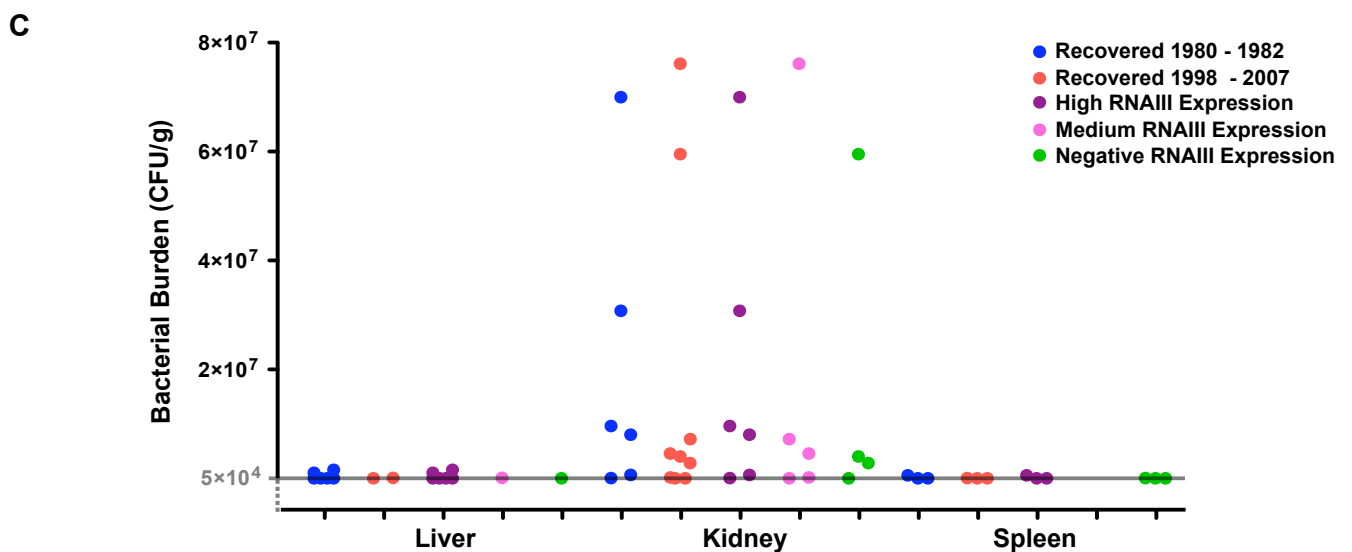

Supplement: mbo004142208sf4.pdf [file mbo004142208sf4.pdf]
